# Supplementary material for: A Combination of Long-Day Suppressor Genes Contributes to the Northward Expansion of Rice
Source: PubMed Central journal article supplement (PMC7308711; doi:10.3389/fpls.2020.00864), 2020-06-16
Supplement: Image_3.pdf [file Image_3.pdf]

**A**

DTH8

894 bp

100 bp

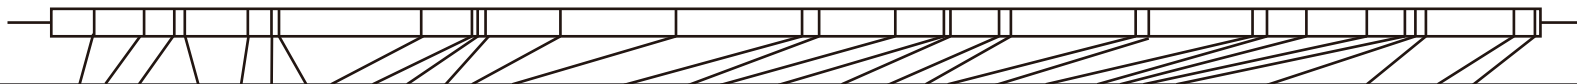

| Position | 26                 | 56  | 74   | 80   | 118  | 132  | 139 | 222  | 256 | 261  | 282 | 306 | 375 | 451      | 461  | 507   | 536   | 539 | 569 | 576   | 651 | 659 | 712   | 730   | 754   | 790   | 813   | 819    | 825   | 878   | 893  | No. of cvs |    |    | Group |
|----------|--------------------|-----|------|------|------|------|-----|------|-----|------|-----|-----|-----|----------|------|-------|-------|-----|-----|-------|-----|-----|-------|-------|-------|-------|-------|--------|-------|-------|------|------------|----|----|-------|
|          | Position variation | H9L | L19S | E25A | Stop | S40G | -   | G47S | -   | S86A | -   | -   | -   | -        | Stop | D154A | E169D | -   | -   | Y190S | -   | -   | D220V | indel | A244T | G252S | I264V | -      | indel | indel | Stop | N298S      | I  | J  |       |
| DTH8_1   | A                  | T   | A    | a    | A    | C    | G   | T    | T   | G    | G   | A   | C   | GAGAAGGC | A    | G     | GCG   | 3bp | A   | C     | C   | A   | GCG   | G     | G     | A     | A     | 6bp    | GCGG4 | TT    | A    | 0          | 1  | 1  | f     |
| DTH8_2   | A                  | T   | A    | a    | A    | C    | G   | G    | T   | G    | G   | A   | C   | 8bp      | A    | G     | GCG   | 3bp | A   | C     | C   | A   | GCG   | G     | G     | A     | A     | 6bp    | GCGG4 | TT    | A    | 4          | 0  | 0  | nf    |
| DTH8_3   | A                  | T   | A    | a    | A    | C    | G   | G    | T   | G    | G   | A   | C   | GAGAAGGC | A    | G     | GCG   | GCG | A   | C     | C   | A   | GCG   | G     | G     | A     | A     | 6bp    | GCGG4 | TT    | A    | 0          | 0  | 10 | f     |
| DTH8_4   | A                  | T   | A    | a    | A    | C    | G   | G    | T   | G    | G   | A   | C   | GAGAAGGC | A    | G     | GCG   | 3bp | A   | C     | C   | A   | GCG   | G     | G     | A     | A     | 6bp    | GCGG4 | TT    | A    | 0          | 34 | 1  | f     |
| DTH8_5   | A                  | T   | A    | 19bp | A    | C    | G   | G    | T   | G    | G   | A   | C   | GAGAAGGC | A    | G     | GCG   | 3bp | A   | C     | C   | A   | GCG   | G     | G     | A     | A     | 6bp    | GCGG4 | TT    | A    | 0          | 1  | 0  | nf    |
| DTH8_6   | T                  | C   | C    | a    | A    | T    | G   | G    | G   | G    | G   | C   | C   | GAGAAGGC | C    | G     | 3bp   | 3bp | C   | C     | C   | C   | GCG   | G     | G     | A     | A     | AGGCGG | GCGG4 | GA    | G    | 0          | 0  | 7  | f     |
| DTH8_7   | A                  | C   | C    | a    | A    | C    | G   | G    | G   | G    | A   | C   | A   | GAGAAGGC | C    | T     | GCG   | 3bp | C   | C     | C   | C   | GCG   | G     | G     | A     | C     | 6bp    | 12bp  | GA    | G    | 0          | 0  | 1  | nf    |
| DTH8_8   | A                  | C   | C    | a    | A    | C    | G   | G    | G   | G    | G   | C   | C   | GAGAAGGC | C    | T     | GCG   | 3bp | C   | C     | C   | C   | GCG   | G     | G     | A     | C     | 6bp    | 12bp  | GA    | G    | 0          | 0  | 1  | nf    |
| DTH8_9   | A                  | C   | C    | a    | A    | C    | G   | G    | G   | G    | G   | C   | C   | GAGAAGGC | C    | G     | 3bp   | 3bp | C   | A     | C   | C   | GCG   | A     | G     | G     | C     | 6bp    | 12bp  | GA    | G    | 0          | 0  | 2  | nf    |
| DTH8_10  | A                  | C   | C    | a    | A    | C    | A   | G    | G   | A    | G   | C   | C   | GAGAAGGC | C    | G     | 3bp   | 3bp | C   | A     | C   | C   | GCG   | G     | G     | A     | C     | 6bp    | 12bp  | GA    | G    | 0          | 0  | 1  | nf    |
| DTH8_11  | A                  | C   | C    | a    | A    | C    | G   | G    | G   | G    | G   | C   | C   | GAGAAGGC | C    | G     | 3bp   | 3bp | C   | A     | C   | C   | GCG   | G     | G     | A     | C     | 6bp    | 12bp  | GA    | G    | 0          | 0  | 1  | nf    |
| DTH8_12  | A                  | C   | C    | a    | G    | C    | G   | G    | G   | G    | G   | C   | C   | GAGAAGGC | C    | G     | 3bp   | 3bp | C   | C     | C   | C   | 3bp   | G     | G     | A     | A     | 6bp    | GCGG3 | TT    | G    | 0          | 0  | 3  | f     |
| DTH8_13  | A                  | C   | C    | a    | A    | C    | G   | G    | G   | G    | G   | C   | C   | GAGAAGGC | C    | G     | GCG   | GCG | C   | C     | T   | C   | GCG   | G     | G     | A     | A     | 6bp    | GCG3  | TT    | G    | 1          | 0  | 0  | f     |
| DTH8_14  | A                  | C   | C    | a    | A    | C    | G   | G    | G   | G    | G   | C   | C   | GAGAAGGC | C    | G     | GCG   | GCG | C   | C     | T   | C   | GCG   | G     | G     | A     | A     | 6bp    | GCGG4 | TT    | G    | 7          | 8  | 5  | f     |
| DTH8_15  | A                  | C   | C    | a    | A    | C    | G   | G    | G   | G    | G   | C   | C   | GAGAAGGC | C    | G     | GCG   | GCG | C   | C     | T   | C   | GCG   | G     | G     | A     | A     | 6bp    | GCG3  | TT    | G    | 18         | 3  | 11 | f     |
| DTH8_16  | A                  | C   | C    | a    | A    | C    | G   | G    | G   | G    | G   | C   | C   | GAGAAGGC | C    | G     | 3bp   | 3bp | C   | C     | T   | C   | GCG   | G     | G     | A     | A     | 6bp    | GCGG4 | TT    | G    | 3          | 0  | 1  | f     |
| DTH8_17  | A                  | C   | C    | a    | A    | C    | G   | G    | G   | G    | G   | C   | C   | GAGAAGGC | C    | G     | 3bp   | 3bp | C   | C     | C   | C   | GCG   | G     | A     | A     | A     | 6bp    | GCGG4 | TT    | G    | 0          | 0  | 8  | f     |
| DTH8_18  | A                  | C   | C    | a    | A    | C    | G   | G    | G   | G    | G   | C   | C   | GAGAAGGC | C    | G     | 3bp   | 3bp | C   | C     | C   | C   | GCG   | G     | G     | A     | A     | 6bp    | GCGG4 | TT    | G    | 0          | 0  | 3  | f     |

groupB

groupA





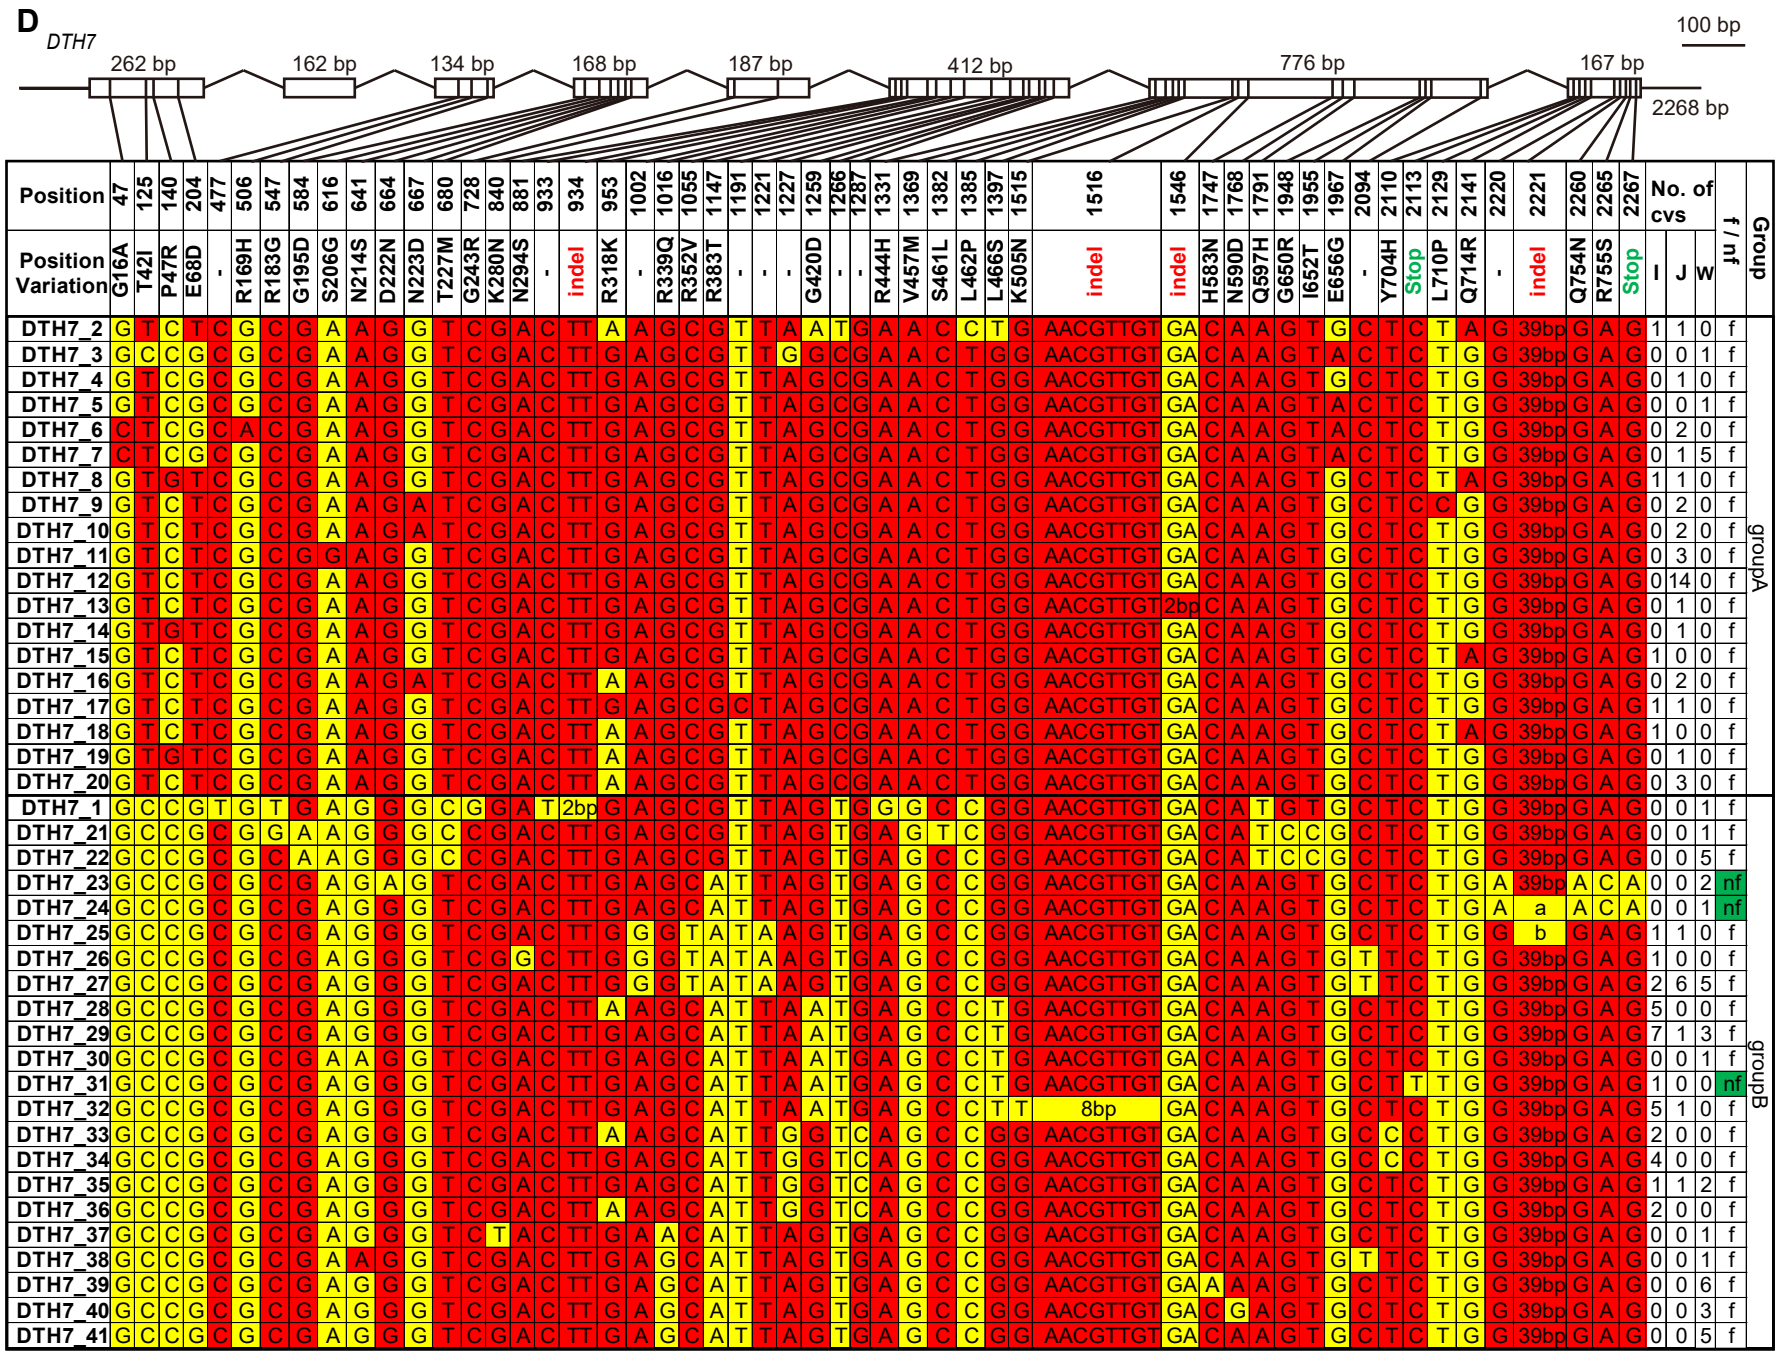

E

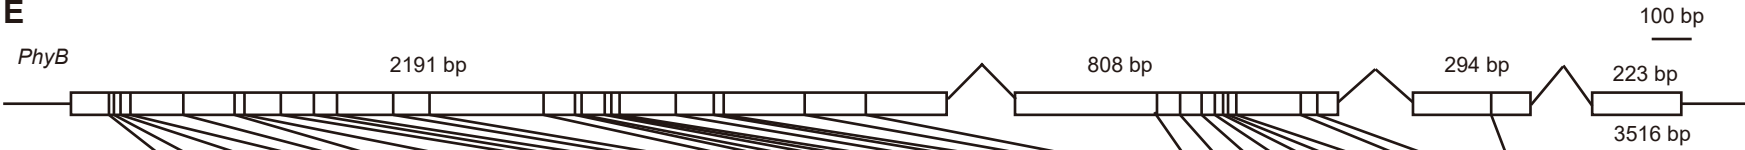

| Position | 96                 | 104  | 124    | 150 | 282 | 412   | 436       | 525 | 605   | 663 | 808   | 899   | 1183  | 1263 | 1281 | 1338 | 1344 | 1368 | 1515  | 1606  | 1638 | 1833 | 1986 | 2546  | 2604 | 2658  | 2893  | 2914  | 2725  | 2745 | 2908  | 2947 | 3193  | No. of cvs |    |    | Group |        |
|----------|--------------------|------|--------|-----|-----|-------|-----------|-----|-------|-----|-------|-------|-------|------|------|------|------|------|-------|-------|------|------|------|-------|------|-------|-------|-------|-------|------|-------|------|-------|------------|----|----|-------|--------|
|          | Position variation | T35M | indel  | -   | -   | E138K | indel     | -   | R202K | -   | H270Y | S300N | A395S | -    | -    | -    | -    | -    | E505D | P536S | -    | -    | -    | N849I | -    | K886N | T898M | E905V | A909T | -    | D970N | Stop | V1065 | I          | J  | W  |       | f / nf |
| PhyB_2   | C                  | C    | GGCGGG | C   | G   | G     | CTGTCGCCC | C   | G     | C   | C     | A     | T     | C    | C    | C    | A    | G    | A     | C     | T    | G    | G    | A     | C    | T     | C     | A     | G     | T    | G     | A    | G     | 0          | 0  | 2  | f     | groupA |
| PhyB_3   | C                  | C    | GGCGGG | C   | G   | G     | CTGTCGCCC | C   | G     | C   | T     | A     | T     | C    | C    | C    | G    | G    | A     | C     | T    | G    | A    | A     | C    | T     | C     | A     | G     | T    | G     | A    | G     | 0          | 6  | 0  | f     |        |
| PhyB_4   | C                  | C    | GGCGGG | C   | G   | G     | CTGTCGCCC | C   | G     | C   | T     | A     | T     | C    | C    | C    | G    | G    | A     | C     | T    | G    | G    | A     | C    | T     | C     | A     | G     | T    | G     | A    | G     | 0          | 1  | 0  | f     |        |
| PhyB_5   | C                  | C    | GGCGGG | C   | G   | G     | CTGTCGCCC | C   | G     | C   | T     | A     | T     | C    | C    | C    | G    | G    | A     | C     | T    | G    | G    | A     | C    | T     | C     | A     | G     | T    | G     | A    | G     | 1          | 30 | 0  | f     |        |
| PhyB_7   | C                  | C    | GGCGGG | C   | C   | G     | CTGTCGCCC | C   | G     | C   | C     | G     | T     | C    | C    | C    | G    | G    | A     | C     | T    | A    | G    | A     | C    | T     | C     | A     | G     | T    | G     | A    | G     | 0          | 1  | 0  | f     |        |
| PhyB_28  | C                  | C    | GGCGGG | A   | G   | G     | CTGTCGCCC | C   | A     | C   | C     | G     | G     | C    | C    | C    | G    | G    | A     | C     | C    | A    | G    | A     | C    | T     | C     | A     | A     | T    | G     | A    | G     | 0          | 0  | 1  | f     |        |
| PhyB_1   | G                  | C    | GGCGGG | C   | G   | G     | CTGTCGCCC | C   | G     | T   | C     | G     | G     | T    | C    | C    | G    | G    | A     | C     | C    | A    | G    | A     | C    | A     | C     | A     | G     | T    | G     | A    | G     | 0          | 0  | 2  | f     | groupB |
| PhyB_6   | C                  | C    | GGCGGG | C   | G   | G     | CTGTCGCCC | C   | G     | T   | C     | G     | G     | C    | C    | T    | G    | G    | T     | C     | C    | A    | G    | A     | C    | T     | C     | A     | G     | T    | G     | A    | G     | 0          | 0  | 6  | f     |        |
| PhyB_8   | C                  | C    | GGCGGG | C   | C   | G     | CTGTCGCCC | C   | G     | C   | C     | G     | T     | C    | C    | C    | G    | G    | A     | C     | C    | A    | A    | A     | C    | T     | C     | A     | G     | T    | G     | A    | G     | 0          | 1  | 0  | f     |        |
| PhyB_9   | C                  | C    | GGCGGG | A   | C   | G     | CTGTCGCCC | T   | G     | C   | C     | G     | G     | C    | C    | C    | G    | G    | A     | T     | C    | A    | G    | A     | C    | T     | C     | A     | G     | C    | G     | A    | G     | 0          | 0  | 1  | f     |        |
| PhyB_10  | C                  | C    | GGCGGG | A   | C   | G     | CTGTCGCCC | T   | G     | C   | C     | G     | G     | C    | C    | C    | G    | G    | A     | C     | C    | A    | G    | A     | C    | T     | C     | A     | G     | T    | G     | A    | G     | 0          | 0  | 1  | f     |        |
| PhyB_11  | C                  | C    | GGCGGG | C   | C   | G     | CTGTCGCCC | T   | G     | C   | C     | G     | G     | C    | C    | C    | G    | G    | A     | C     | C    | A    | G    | A     | C    | T     | C     | A     | G     | T    | G     | A    | G     | 0          | 0  | 1  | f     |        |
| PhyB_12  | C                  | C    | GGCGGG | C   | C   | G     | CTGTCGCCC | T   | G     | C   | C     | G     | G     | C    | C    | C    | G    | G    | A     | T     | C    | A    | G    | A     | C    | T     | C     | A     | G     | T    | G     | A    | A     | 1          | 0  | 0  | f     |        |
| PhyB_13  | C                  | C    | GGCGGG | C   | C   | A     | CTGTCGCCC | T   | G     | C   | C     | G     | G     | C    | C    | C    | G    | G    | A     | T     | C    | A    | G    | A     | C    | T     | C     | A     | G     | T    | G     | A    | G     | 1          | 0  | 0  | f     |        |
| PhyB_14  | C                  | C    | GGCGGG | C   | C   | G     | CTGTCGCCC | C   | G     | C   | C     | G     | G     | C    | C    | C    | G    | G    | A     | T     | C    | A    | G    | A     | C    | T     | C     | A     | G     | T    | G     | A    | G     | 0          | 0  | 1  | f     |        |
| PhyB_15  | C                  | C    | GGCGGG | C   | C   | G     | CTGTCGCCC | T   | G     | C   | C     | G     | G     | C    | C    | C    | G    | G    | A     | T     | C    | A    | G    | A     | C    | T     | C     | A     | G     | T    | G     | A    | G     | 0          | 0  | 1  | f     |        |
| PhyB_16  | C                  | C    | GGCGGG | C   | C   | G     | 9bp       | T   | G     | C   | C     | G     | G     | C    | C    | C    | G    | G    | A     | T     | C    | A    | G    | A     | C    | T     | C     | A     | G     | T    | G     | A    | G     | 0          | 0  | 1  | f     |        |
| PhyB_17  | C                  | C    | GGCGGG | C   | C   | G     | CTGTCGCCC | T   | G     | C   | C     | G     | G     | C    | C    | C    | G    | G    | A     | T     | C    | A    | G    | A     | C    | T     | C     | A     | G     | T    | G     | A    | G     | 28         | 6  | 17 | f     |        |
| PhyB_18  | C                  | C    | GGCGGG | C   | C   | G     | CTGTCGCCC | T   | G     | C   | C     | G     | G     | C    | C    | C    | G    | G    | A     | T     | C    | A    | G    | A     | C    | T     | C     | A     | G     | T    | G     | T    | G     | 1          | 0  | 0  | nf    |        |
| PhyB_19  | C                  | C    | 6bp    | C   | G   | G     | CTGTCGCCC | C   | G     | C   | C     | G     | G     | C    | C    | C    | G    | G    | A     | C     | C    | A    | G    | T     | C    | T     | C     | T     | G     | T    | G     | A    | G     | 0          | 0  | 1  | f     |        |
| PhyB_20  | C                  | C    | 6bp    | C   | G   | G     | CTGTCGCCC | C   | G     | C   | C     | G     | G     | C    | C    | C    | G    | G    | A     | C     | C    | A    | G    | A     | C    | T     | T     | T     | G     | T    | G     | A    | G     | 0          | 0  | 1  | f     |        |
| PhyB_21  | C                  | C    | 6bp    | C   | G   | G     | CTGTCGCCC | C   | G     | C   | C     | G     | G     | C    | C    | C    | G    | G    | A     | C     | C    | A    | G    | A     | C    | T     | C     | T     | G     | T    | G     | A    | G     | 0          | 0  | 2  | f     |        |
| PhyB_22  | C                  | C    | GGCGGG | A   | G   | G     | CTGTCGCCC | C   | G     | C   | C     | G     | G     | C    | C    | C    | G    | G    | A     | C     | C    | A    | G    | A     | C    | T     | C     | A     | G     | C    | G     | A    | G     | 0          | 0  | 3  | f     |        |
| PhyB_23  | C                  | C    | GGCGGG | A   | G   | G     | CTGTCGCCC | C   | G     | C   | C     | G     | G     | C    | C    | C    | G    | A    | A     | C     | C    | A    | G    | A     | C    | T     | C     | A     | G     | T    | G     | A    | G     | 0          | 0  | 1  | f     |        |
| PhyB_24  | C                  | T    | GGCGGG | A   | G   | G     | CTGTCGCCC | C   | G     | C   | C     | G     | G     | C    | C    | C    | G    | G    | A     | C     | C    | A    | G    | A     | C    | T     | C     | A     | G     | T    | G     | A    | G     | 0          | 0  | 1  | f     |        |
| PhyB_25  | C                  | C    | GGCGGG | A   | G   | G     | CTGTCGCCC | C   | A     | C   | C     | G     | G     | C    | C    | C    | G    | G    | A     | C     | C    | A    | G    | A     | C    | T     | C     | A     | G     | T    | G     | A    | G     | 0          | 0  | 2  | f     |        |
| PhyB_26  | C                  | C    | GGCGGG | A   | G   | G     | CTGTCGCCC | C   | G     | C   | C     | G     | G     | C    | C    | C    | G    | G    | A     | C     | C    | A    | G    | A     | C    | T     | C     | A     | G     | T    | G     | A    | G     | 0          | 0  | 1  | f     |        |
| PhyB_27  | C                  | C    | GGCGGG | A   | G   | G     | CTGTCGCCC | C   | A     | C   | C     | G     | G     | C    | C    | C    | G    | G    | A     | C     | C    | A    | G    | A     | T    | T     | C     | A     | A     | T    | G     | A    | G     | 0          | 0  | 1  | f     |        |

F

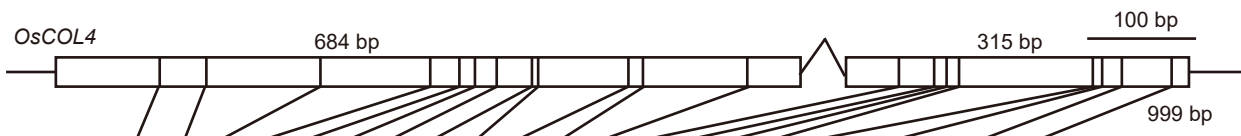

| Position           | 96 | 138 | 243 | 344   | 370   | 385   | 404   | 438 | 442   | 526   | 540 | 634   | 733   | 765 | 777   | 788   | 911   | 919    | 938   | 984 | No. of cvs |    |    | f / nt | Group  |
|--------------------|----|-----|-----|-------|-------|-------|-------|-----|-------|-------|-----|-------|-------|-----|-------|-------|-------|--------|-------|-----|------------|----|----|--------|--------|
| Position Variation | -  | -   | -   | A115V | A124T | P129T | A135E | -   | D148N | D176Y | -   | N212D | A272S | -   | K286N | E290A | T331N | indel  | A340E | -   |            |    |    |        |        |
| OsCOL4_16          | C  | G   | C   | C     | G     | C     | C     | T   | G     | G     | C   | G     | G     | G   | C     | C     | C     | GCCGAC | C     | C   | 0          | 1  | 1  | f      | groupA |
| OsCOL4_17          | C  | G   | C   | C     | A     | C     | C     | T   | G     | G     | C   | G     | T     | G   | G     | C     | C     | GCCGAC | C     | C   | 0          | 1  | 0  | f      |        |
| OsCOL4_18          | C  | G   | C   | C     | G     | C     | C     | T   | G     | G     | C   | G     | T     | G   | G     | C     | C     | GCCGAC | C     | C   | 1          | 26 | 3  | f      |        |
| OsCOL4_1           | T  | G   | C   | C     | G     | C     | C     | C   | G     | G     | C   | A     | G     | G   | G     | A     | C     | GCCGAC | C     | C   | 0          | 0  | 5  | f      | groupB |
| OsCOL4_2           | C  | A   | C   | C     | G     | A     | C     | C   | G     | G     | C   | G     | G     | G   | C     | C     | C     | GCCGAC | C     | C   | 7          | 1  | 5  | f      |        |
| OsCOL4_3           | C  | G   | C   | C     | G     | A     | C     | C   | G     | G     | C   | G     | G     | C   | G     | C     | C     | GCCGAC | C     | C   | 2          | 0  | 1  | f      |        |
| OsCOL4_4           | C  | G   | C   | C     | G     | A     | C     | C   | G     | G     | C   | G     | G     | C   | G     | C     | C     | GCCGAC | A     | C   | 0          | 0  | 1  | f      |        |
| OsCOL4_5           | C  | G   | C   | T     | G     | A     | C     | C   | G     | G     | C   | G     | T     | G   | G     | C     | C     | GCCGAC | C     | C   | 0          | 0  | 1  | f      |        |
| OsCOL4_6           | C  | G   | C   | T     | G     | A     | C     | C   | G     | G     | C   | G     | G     | G   | C     | C     | C     | GCCGAC | C     | C   | 8          | 7  | 4  | f      |        |
| OsCOL4_7           | C  | G   | C   | T     | G     | A     | C     | C   | G     | G     | C   | G     | G     | G   | C     | C     | C     | GCCGAC | C     | C   | 2          | 0  | 0  | f      |        |
| OsCOL4_8           | C  | G   | C   | C     | G     | C     | A     | C   | A     | G     | C   | G     | G     | G   | G     | C     | C     | GCCGAC | C     | C   | 0          | 0  | 1  | f      |        |
| OsCOL4_9           | C  | G   | A   | C     | G     | C     | C     | C   | G     | G     | A   | G     | G     | G   | G     | C     | C     | GCCGAC | C     | C   | 0          | 0  | 1  | f      |        |
| OsCOL4_10          | C  | G   | A   | C     | G     | C     | C     | C   | G     | G     | C   | G     | G     | G   | G     | C     | C     | GCCGAC | C     | G   | 0          | 0  | 5  | f      |        |
| OsCOL4_11          | C  | G   | A   | C     | G     | C     | C     | C   | G     | G     | C   | G     | G     | G   | G     | C     | C     | GCCGAC | C     | C   | 6          | 2  | 5  | f      |        |
| OsCOL4_12          | C  | G   | A   | C     | G     | C     | C     | C   | G     | G     | C   | G     | G     | G   | G     | C     | C     | 6bp    | C     | C   | 0          | 0  | 2  | f      |        |
| OsCOL4_13          | C  | G   | C   | C     | G     | C     | C     | C   | G     | G     | C   | G     | G     | G   | G     | C     | C     | GCCGAC | C     | C   | 2          | 1  | 18 | f      |        |
| OsCOL4_14          | C  | G   | C   | C     | G     | C     | A     | C   | G     | G     | C   | G     | G     | G   | G     | C     | C     | GCCGAC | C     | C   | 0          | 0  | 2  | f      |        |
| OsCOL4_15          | C  | G   | C   | C     | G     | A     | C     | C   | G     | G     | C   | G     | G     | G   | G     | C     | A     | GCCGAC | C     | C   | 1          | 0  | 0  | f      |        |
| OsCOL4_19          | C  | G   | C   | C     | G     | C     | C     | C   | G     | T     | C   | G     | G     | G   | G     | C     | C     | GCCGAC | C     | C   | 0          | 0  | 1  | f      |        |
| OsCOL4_20          | C  | A   | C   | C     | G     | C     | C     | C   | G     | G     | C   | G     | G     | G   | G     | C     | C     | GCCGAC | C     | C   | 0          | 0  | 1  | f      |        |
| OsCOL4_21          | C  | G   | C   | C     | G     | A     | C     | C   | G     | G     | C   | G     | G     | G   | G     | C     | C     | GCCGAC | C     | C   | 2          | 0  | 1  | f      |        |
| OsCOL4_22          | C  | G   | C   | C     | G     | C     | C     | C   | G     | G     | C   | G     | G     | G   | G     | C     | C     | GCCGAC | C     | G   | 0          | 0  | 1  | f      |        |

**G**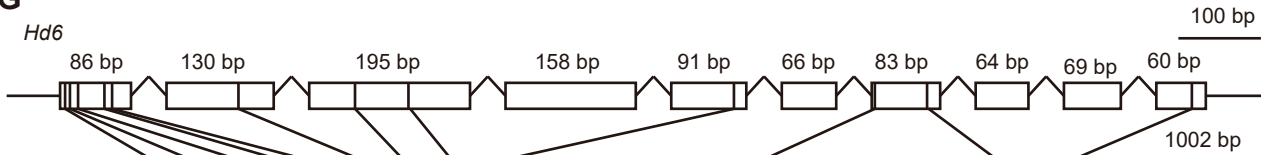

| Position           | 6 | 11  | 22  | 55   | 64   | 176  | 271  | 336 | 645 | 727                            | 792 | 986   | No. of cvs |    |    | f / nf |
|--------------------|---|-----|-----|------|------|------|------|-----|-----|--------------------------------|-----|-------|------------|----|----|--------|
| Position Variation | . | A4G | A8P | W19R | E22K | K59R | Stop | .   | .   | indel                          | .   | R329T | I          | J  | W  |        |
| Hd6_1              | G | C   | G   | T    | G    | A    | A    | C   | C   | GTACTTGG AACAGAAGCACTAAATGCTTA | T   | G     | 35         | 30 | 42 | f      |
| Hd6_2              | G | C   | G   | T    | G    | A    | A    | C   | C   | GTACTTGG AACAGAAGCACTAAATGCTTA | T   | C     | 0          | 0  | 1  | f      |
| Hd6_3              | G | C   | G   | T    | G    | A    | A    | C   | T   | GTACTTGG AACAGAAGCACTAAATGCTTA | T   | G     | 0          | 0  | 1  | f      |
| Hd6_4              | A | G   | C   | T    | A    | A    | A    | C   | C   | GTACTTGG AACAGAAGCACTAAATGCTTA | T   | G     | 0          | 0  | 1  | f      |
| Hd6_5              | G | C   | G   | T    | G    | G    | A    | C   | C   | GTACTTGG AACAGAAGCACTAAATGCTTA | T   | G     | 0          | 0  | 1  | f      |
| Hd6_6              | G | C   | C   | T    | G    | A    | A    | C   | C   | GTACTTGG AACAGAAGCACTAAATGCTTA | T   | G     | 0          | 0  | 1  | f      |
| Hd6_7              | G | C   | G   | T    | G    | A    | A    | T   | C   | GTACTTGG AACAGAAGCACTAAATGCTTA | T   | G     | 0          | 0  | 2  | f      |
| Hd6_8              | G | G   | C   | T    | A    | A    | A    | C   | C   | GTACTTGG AACAGAAGCACTAAATGCTTA | T   | G     | 0          | 0  | 3  | f      |
| Hd6_9              | A | C   | C   | T    | A    | A    | A    | C   | C   | GTACTTGG AACAGAAGCACTAAATGCTTA | T   | G     | 0          | 0  | 1  | f      |
| Hd6_10             | G | C   | G   | C    | G    | A    | A    | C   | C   | GTACTTGG AACAGAAGCACTAAATGCTTA | T   | G     | 0          | 2  | 0  | f      |
| Hd6_11             | G | C   | G   | T    | G    | A    | A    | C   | C   | GTACTTGG AACAGAAGCACTAAATGCTTA | C   | G     | 0          | 3  | 0  | f      |
| Hd6_12             | G | C   | G   | T    | G    | A    | T    | C   | C   | GTACTTGG AACAGAAGCACTAAATGCTTA | T   | G     | 0          | 9  | 0  | nf     |
| Hd6_13             | G | C   | G   | T    | G    | A    | A    | C   | C   | 29bp                           | T   | G     | 0          | 1  | 0  | f      |

**H**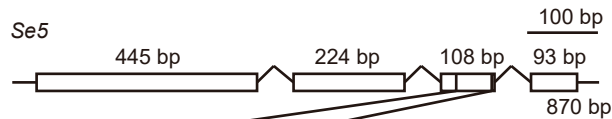

| Position           | 700 | 771 | No. of cvs |    |    | f / nf |
|--------------------|-----|-----|------------|----|----|--------|
| Position Variation | .   | .   | I          | J  | W  |        |
| Se5_1              | T   | C   | 9          | 1  | 9  | f      |
| Se5_2              | C   | A   | 0          | 0  | 1  | f      |
| Se5_3              | C   | C   | 25         | 44 | 51 | f      |
