# Supplementary material for: A Combination of Long-Day Suppressor Genes Contributes to the Northward Expansion of Rice
Source: Front Plant Sci. 2020 Jun 16;11:864. doi: 10.3389/fpls.2020.00864 (PMC7308711; doi:10.3389/fpls.2020.00864)
Supplement: Supplementary file 9 [file Table_4.xlsx]

## Sheet: Sheet1
Table S4 The significance test of rice heading date
Gene	Group	Number	Average (days)	Shapiro-Wilk normality test	t-test	Wilcoxon test
DTH8	A	38	116.87	0.0007401	1.26E-13***	5.42E-6***
	B	11	184.98
Ghd7	A	31	121.1	0.0007676	0.01078**	0.01379**
	B	16	156.5
PhyB	A	35	121.6	0.0004741	0.06525*	0.1248
	B	16	147.5
DTH7	A	32	120.8	0.0003878	0.03813**	0.07655*
	B	18	148.7
OsCOL4	A	23	124.8	0.0008243	0.1862	0.5375
	B	17	143.2
Hd1	A	10	119.4	0.001975	0.1793	0.2086
	B	35	137.6
